# Supplementary material for: Exotic and Emergent Citrus Viruses Relevant to the Mediterranean Region
Source: MDPI journal article supplement (doi:10.3390/agriculture11090839), 2021-08-31
Supplement: s1 [file s1]

Supplementary table S3. Mediterranean distribution of vectors of exotic and Citrus viruses relevant for the Mediterranean region, their categorization and mode of transmission.

| Species                             | Mediterranean distribution                                               | Categorization                                                                | Virus vectored   | Transmission    | Reference                                           |
|-------------------------------------|--------------------------------------------------------------------------|-------------------------------------------------------------------------------|------------------|-----------------|-----------------------------------------------------|
| <i>Aphis (Toxoptera) citricidus</i> | Spread in restricted areas of Portugal and Spain                         | EPPO, A2 list<br>EU Quarantine pest<br>OIRSU A1 list                          | CTV              | Semi-Persistent | Moreno et al., 2008 [5]                             |
|                                     |                                                                          |                                                                               | CSDaV            |                 | Maccheroni et al., 2005 [43]                        |
| <i>Aphis (Toxoptera) aurantii</i>   | Widespread                                                               |                                                                               | CTV              | Semi-Persistent | Moreno et al., 2008 [5]                             |
| <i>Aphis craccivora</i>             | Widespread/                                                              |                                                                               | CTV              | Semi-Persistent | Moreno et al., 2008 [5]                             |
|                                     |                                                                          |                                                                               | CYVCV            |                 | Onelge et al., 2011 [45]                            |
| <i>Aphis gossypii</i>               | Widespread                                                               | /                                                                             | CTV              | Semi-Persistent | Moreno et al., 2008 [5]                             |
|                                     |                                                                          |                                                                               | CSDaV            |                 | Maccheroni et al., 2005 [43]                        |
|                                     |                                                                          |                                                                               | CYVCV            |                 | Afloukou et al., 2021 [44]                          |
| <i>Aphis spiraecola</i>             | Widespread                                                               | /                                                                             | CTV              | Semi-persistent | Moreno et al., 2008 [5]                             |
|                                     |                                                                          |                                                                               | CSDaV            |                 | Maccheroni et al., 2005 [43]                        |
|                                     |                                                                          |                                                                               | CYVCV            |                 | Onelge et al., 2011 [45], Zhang et al., 2018 [46]   |
| <i>Brevipalpus phoenicis</i>        | Greece, Italy, Portugal, Spain, Egypt, Morocco, Tunisia                  | /                                                                             | CiLV             | Persistent      | Bastianel et al., 2010 [47], Kubo et al., 2011 [48] |
| <i>Brevipalpus californicus</i>     | Algeria, Egypt, Libya, Cyprus, France, Greece, Italy, Portugal, Spain    | Turkey, A1 list                                                               | CiLV, OFV-Citrus | Persistent      | Bastianel et al., 2010 [47], Kubo et al., 2011 [48] |
| <i>Brevipalpus obovatus</i>         | /                                                                        | /                                                                             | CiLV             | Persistent      | Bastianel et al., 2010 [47], Kubo et al., 2011 [48] |
| <i>Brevipalpus yothersi</i>         | Spain, France                                                            |                                                                               | CiLV-C, CiLV-C2  | Persistent      | Bastianel et al., 2010 [47], Kubo et al., 2011 [48] |
| <i>Dialeurodes citri</i>            | Croatia, Cyprus, France, Greece, Italy, Malta, Montenegro, Spain, Turkey | /                                                                             | CYVCV            |                 | Zhang et al., 2019 [49]                             |
| <i>Parabemisia myricae</i>          | Algeria, Egypt, Morocco, Tunisia, Israel, Cyprus, Spain and Italy        | Egypt, A2 list<br>East Africa A1 list<br>Southern Africa, A1 list<br>EU, RNQP | CCDaV            |                 | Korkmaz et al., 1995 [50]                           |

|                          |            |   |      |              |                           |
|--------------------------|------------|---|------|--------------|---------------------------|
| <i>Planococcus citri</i> | Widespread | / | CYMV | Experimental | Garnsey et al., 1998 [51] |
|--------------------------|------------|---|------|--------------|---------------------------|
