# Supplementary material for: Exotic and Emergent Citrus Viruses Relevant to the Mediterranean Region
Source: MDPI journal article supplement (doi:10.3390/agriculture11090839), 2021-08-31
Supplement: s1 [file s1]

Supplementary Table S1. Global citrus production (in metric tons) in the Mediterranean countries, adapted from the USDA report in January 2021 for 2020/21 (USDA, FAS 2021, accessed July 2021).

| Country                                                          | Oranges       | Tangerines/<br>Mandarins | Lemons/<br>Limes | Grapefruits | Total         |
|------------------------------------------------------------------|---------------|--------------------------|------------------|-------------|---------------|
| EU<br>Spain, Italy, Greece, Portugal,<br>France, Cyprus, Croatia | 6.556         | 3.117                    | 1.640            | 96          | 11.409        |
| Egypt                                                            | 3.400         | -                        | -                | -           | 3.400         |
| Turkey                                                           | 1.360         | 1.760                    | 1.000            | 290         | 4.410         |
| Morocco                                                          | 1.100         | 1.205                    | -                | -           | 2.305         |
| Israel                                                           | -             | -                        | 70               | -           | 70            |
| <b>Total</b>                                                     | <b>12.416</b> | <b>6.072</b>             | <b>2.780</b>     | <b>386</b>  | <b>21.054</b> |
| World                                                            | 49.361        | 33.064                   | 8.314            | 6.859       | 97.598        |
| % of the world                                                   | 25.1          | 18.3                     | 33.4             | 5.6         | 21.5          |
