# Supplementary material for: Exotic and Emergent Citrus Viruses Relevant to the Mediterranean Region
Source: MDPI journal article supplement (doi:10.3390/agriculture11090839), 2021-08-31
Supplement: s1 [file s1]

Supplementary Table S2. Full genomes sequences of CTV available in GenBank (as of July 2021)

| Genotype   | Isolate                                                      | Country         | Host                                             | Molecule target | Sequencing method | Reference                         |
|------------|--------------------------------------------------------------|-----------------|--------------------------------------------------|-----------------|-------------------|-----------------------------------|
| T36        | T36                                                          | USA, Florida    | Mexican lime                                     | RNA             | Sanger            | Karasev et al., 1995 [21]         |
|            | 1479                                                         | USA             | Citrus macrophylla                               | sRNA            | HTS               | Unpublished                       |
|            | CCTEA96339                                                   | USA, California | C. aurantium                                     | RNA             | Sanger            | Chen et al., 2018 [22]            |
|            | /                                                            | Mexico          | /                                                | RNA             | Sanger            | Unpublished                       |
|            | /                                                            |                 | Citrus sp.                                       | RNA             | Sanger            | Pappu et al., 1994 [23]           |
|            | Mac25                                                        | Italy           | C. aurantium                                     | sRNA            | HTS               | Scuderi et al., 2016 [24]         |
|            | FS577<br>FS703-T36; FS701-T36<br>FS674-T36                   | USA, Florida    | C. macrophylla<br>C. reticulata<br>C. sinensis   | sRNA            | HTS               | Harper, 2013 [15]                 |
|            | Qaha                                                         | Egypt           | /                                                | RNA             | Sanger            | Unpublished                       |
|            | FS2-2                                                        | Usa, Florida    | C. sinensis                                      | RNA             | Microarray        | Weng et al., 2007 [25]            |
| T68 (B165) | B165                                                         | India           | C. reticulata cv. Ellendale                      | RNA             | Sanger            | Roy and Brlansky, 2010 [26]       |
|            | GFMS12_Duncan<br>GFMS12-9, GFMS12-7,<br>GFMS12-8, GFMS12-1.3 | South Africa    | C. paradisi<br>C. aurantifolia                   | RNA             | HTS<br>Sanger     | Cook et al., 2020 [27]            |
|            | NZ-B18                                                       | New Zealand     | Citrus sinensis                                  | RNA             | Sanger            | Harper et al., 2009 [28]          |
|            | CT-ZA3                                                       | South Africa    | Citrus aurantifolia                              | RNA             | HTS               | Zablocki and Pietersen, 2014 [29] |
|            | CT14A                                                        | China           | Citrus sinensis                                  | RNA             | Sanger            | Unpublished                       |
|            | T68-1                                                        | USA, Florida    | Citrus macrophylla                               | RNA             | Sanger            | Harper, 2013 [15]                 |
| VT         | SG29                                                         | Italy           | 'Hamlin' sw.orange                               | sRNA            | HTS               | Licciardello et al., 2015 [30]    |
|            | VT                                                           | Israel          |                                                  | RNA             | Sanger            | Mawassi et al., 1996 [31]         |
|            | Mac39, Mac101                                                | Italy           | C. aurantium                                     | sRNA            | HTS               | Licciardello et al., 2021 [32]    |
|            | FN08                                                         | China           | C. reticulata                                    | /               | HTS               | Unpublished                       |
|            | M423GR, L192GR                                               | Greece          | C. reticulata x C. sinensis cv. Ortanique, Lemon | /               | HTS               | Varveri et al., 2015 [33]         |
|            | Maxi                                                         | South Africa    | C. aurantifolia                                  | RNA             | Sanger            | Unpublished                       |
|            | T318A                                                        | Spain           | /                                                | RNA             | Sanger            | Ruiz-Ruiz et al., 2005 [34]       |
|            | CA-VT-AT39                                                   | USA, California | C. reticulata 'Shiranui'                         | sRNA            | HTS               | Yokomi et al., 2018 [20]          |

|     |                                                         |                 |                                |           |            |                                 |
|-----|---------------------------------------------------------|-----------------|--------------------------------|-----------|------------|---------------------------------|
|     | FS701-VT<br>FL202-VT, FS703-VT                          | Usa, Florida    | C. sinensis<br>C. reticulata   | sRNA      | HTS        | Harper, 2013 [15]               |
|     | FS2-2                                                   | Usa, Florida    | C. sinensis                    | RNA       | Microarray | Weng et al., 2007 [25]          |
|     | Kpg3                                                    | India           | C. reticulata                  | RNA       | Sanger     | Biswas et al., 2012 [35]        |
|     | YN1-6                                                   | China           | C. reticulata                  | /         | HTS        | Unpublished                     |
|     | CSL02                                                   | Brasil          | C. sinensis                    | sRNA/RNA  | HTS        | Matsumura et al., 2017 [36]     |
|     | HU-PSTS                                                 | China           | C. aurantium                   | Small RNA | HTS        | Licciardello et al., 2021 [32]  |
|     | SY568                                                   | USA, California | C. sinensis                    | RNA       | Sanger     | Yang et al., 1999 [37]          |
|     | AT-1                                                    | China           | C sinensis                     | RNA       | Sanger     | Unpublished                     |
|     | NUagA                                                   | Japan           | unknown                        | RNA       | Sanger     | Unpublished                     |
| T30 | Bau282                                                  | Italy           | 'Hamlin' sw.orange             | sRNA      | HTS        | Licciardello et al., 2015 [30]  |
|     | N4                                                      | China           | Sweet orange                   | /         | /          | Unpublished                     |
|     | 702 5a                                                  | USA, California | Mexican lime                   | RNA       | Sanger     | Chen et al., 2018 [22]          |
|     | CA-T30-AT4                                              | USA, California | C. reticulata                  | sRNA      | HTS        | Yokomi et al., 2018 [20]        |
|     | FS703-T30, FS701-T30<br>FL278-T30                       | Usa, Florida    | C. reticulata<br>C. paradisi   | sRNA      | HTS        | Harper, 2013 [15]               |
|     | Taiwan-Pum/M/T5                                         | Taiwan          | C. grandis                     | RNA       | Sanger     | Unpublished                     |
|     | FS2-2                                                   | Usa, Florida    | C. sinensis                    | RNA       | Microarray | Weng et al., 2007 [25]          |
|     | T30                                                     | Usa, Florida    | /                              | RNA       | Sanger     | Albiach-marti et al., 2000 [38] |
|     | T385                                                    | Spain           | /                              | RNA       | Sanger     | Vives et al., 1999 [39]         |
| RB  | B301                                                    | Puerto Rico     | Sw. orange cv.<br>Madam Vinous | RNA       | Sanger     | Roy et al., 2013 [40]           |
|     | CN-RB-L13, CN-RB-9                                      | China           | C. grandis                     | /         | HTS        | Unpublished                     |
|     | B389-4, B389-1, B390-5                                  | South Africa    | C aurantifolia                 | RNA       | Sanger     | Unpublished                     |
|     | DSST-17                                                 | Uruguay         | C.sinensis                     | RNA       | HTS        | Unpublished                     |
|     | NZRB-M17, NZRB-TH30,<br>NZRB-TH28, NZRB-G90,<br>NZRB-M1 | New Zealand     | Poncirus trifoliata            | RNA       | Sanger     | Harper et al., 2010 [41]        |
|     | CA-RB-115<br>CA-RB-AT35, A-RB-AT25                      | USA, California | C. sinensis<br>C. reticulata   | Small RNA | HTS        | Yokomi et al., 2017 [16]        |
|     | Taiwan-Pum/SP/T1                                        | Taiwan          | C. grandis                     | RNA       | Sanger     | Unpublished                     |
|     | CSL02                                                   | Brasil          | C. sinensis                    | sRNA /RNA | HTS        | Matsumura et al., 2017 [36]     |
| T3  | T3                                                      | USA, Florida    | C. sinensis                    | RNA       | Sanger     | Unpublished                     |
|     | T3-KB                                                   | South Africa    | C. aurantifolia                | RNA       | Sanger     | Unpublished                     |

|        |                      |                 |                                                  |      |        |                          |
|--------|----------------------|-----------------|--------------------------------------------------|------|--------|--------------------------|
|        | NZ-M16               | New Zealand     | <i>C. aurantifolia</i>                           | RNA  | Sanger | Harper et al., 2009 [28] |
| HA16-5 | HA16-5               | USA, Hawaii     | <i>C. latifolia</i>                              | RNA  | Sanger | Melzer et al., 2009 [42] |
|        | LMS6-6               | South Africa    | <i>C. aurantifolia</i>                           | RNA  | Sanger | Unpublished              |
| S1     | CT91-A1              | China           | <i>C. reticulata</i> x <i>C. sinensis</i> (Orah) | /    | HTS    | Unpublished              |
|        | CA-S1-L65<br>CA-S1-L | USA, California | <i>C. sinensis</i><br><i>C. medica</i>           | sRNA | HTS    | Yokomi et al., 2018 [20] |
| L1     | CN-L1-ZT1            | China           | <i>Poncirus trifoliata</i>                       | /    | HTS    | Unpublished              |
| M1     | CN-M1-ZT1            | China           | <i>Poncirus trifoliata</i>                       | /    | HTS    | Unpublished              |
| A-18   | A-18                 | Thailand        | <i>C. reticulata</i>                             | RNA  | Sanger | Unpublished              |
